# Supplementary material for: Plasma and Cerebrospinal Fluid Inflammation and the Blood Brain Barrier in Older Surgical Patients: The Role of Inflammation after Surgery for Elders Study
Source: Research Square preprint supplement (doi:10.21203/rs.3.rs-115991/v1), 2020-12-01
Supplement: Supplementary file 1 [file abd61bbf4f0b22ff415c7a0a.docx]

****RISE Study Group**

[Presented in alphabetical order; individuals listed may be part of multiple groups, but are listed only once under major activity, listed in parentheses].

Principal Investigator: Sharon K. Inouye, MD, MPH (Overall PI; HSL, BIDMC, HMS).

Executive Committee: Steven Arnold, MD (MGH); Bradford Dickerson, MD (MGH Site PI, HMS); Tamara Fong, MD, PhD (HMS, HSL, BIDMC); Richard Jones, ScD (Brown University); Towia Libermann, PhD (HMS, BIDMC); Edward R. Marcantonio, MD, SM (BIDMC Site PI, HMS); Thomas Travison, PhD (HSL, HMS).

Co-Investigators: Simon T. Dillon, PhD (HMS, BIDMC); Jacob Hooker, PhD, (MGH, HMS); Tammy Hshieh, MD (BWH); Long Ngo, PhD (HMS, BIDMC), Hasan Otu, PhD (UNL), Annie Racine, PhD (HMS, HSL); Eva M. Schmitt, PhD (Overall Project Director, HSL); Alexandra Touroutoglou, PhD (HMS, MGH); Sarinnapha Vasunilashorn, PhD (BIDMC).

Surgical Leaders: Ayesha Abdeen, MD (HMS, BIDMC); Douglas Ayres, MD (HMS, BIDMC); Brandon Earp, MD (HMS, BWH); Jeffrey Lange, MD (HMS, BWH).

Surgeons: Gregory Brick, MBCHB (HMS, BWH); Antonia Chen, MD (HMS, BWH); Robert Davis, MD (HMS, BIDMC); Jacob Drew, MD (HMS, BIDMC);Richard Iorio, MD (HMS, BWH); Fulton Kornack, MD (HMS, BWH); Michael Weaver, MD (HMS, BWH); Anthony Webber, MD (HMS, BWH); Richard Wilk, MD (HMS, BWH).

Anesthesiology Leaders: Lisa Kunze, MD (BIDMC, HMS); David Shaff, MD (BWH, HMS); Kamen Vlassakov, MD (BWH, HMS).

Epidemiology Core: Brett Armstrong, MPH (BIDMC); Angelee Banda, MA (BIDMC); Sylvie Bertrand, BS (HSL); Madeline D’Aquila (HSL); Jacqueline Gallagher, MS (BIDMC); Baileigh Hightower, BA (MGH); Shannon Malloy, MA (BIDMC); Jacqueline Nee, BA (HSL); Chloe Nobuhara (MGH); Abigail Overstreet, MA (BIDMC); Bianca Trombetta (MGH); David Urick (MGH); Guoquan Xu, MD, PhD (HSL).

Biomedical Imaging Core: Grae Arabasz (MGH); Michael Brickhouse (MGH); Regan Butterfield (MGH); Baileigh Hightower, BA (MGH); Shirley Hsu (MGH); Sara Makaretz (MGH); Judit Sore (MGH).

Data Management and Statistical Analysis Core: Fan Chen, MPH, MS (HSL); Yun Gou, MA (HSL); Douglas Tommet, MS (Brown University).

Fiscal Management Committee: Sabrina Carretie (HSL); Ted Gruen (HSL); Katherine Tasker (Chair, HSL).

Abbreviations: BIDMC, Beth Israel Deaconess Medical Center; BWH, Brigham and Women’s Hospital; HMS, Harvard Medical School; HSL, Hebrew SeniorLife; MGH, Massachusetts General Hospital; PI, principal investigator; UNL, University of Nebraska-Lincoln.
